# Supplementary material for: The Essential Role of Prolines and Their Conformation in Allosteric Regulation of Kaiso Zinc Finger DNA-Binding Activity by the Adjacent C-Terminal Loop
Source: MDPI journal article supplement (doi:10.3390/ijms232415494), 2022-12-07

Supplementary information for:

# **The Essential Role of Prolines and Their Conformation in Allosteric Regulation of Kaiso Zinc Finger DNA-Binding Activity by the Adjacent C-Terminal Loop**

**Elena Belova <sup>1</sup>, Oksana Maksimenko <sup>2</sup>, Pavel Georgiev <sup>1,\*</sup> and Artem Bonchuk <sup>1,2,\*</sup>**

<sup>1</sup> Department of the Control of Genetic Processes, Institute of Gene Biology Russian Academy of Sciences, 34/5 Vavilov St., Moscow 119334, Russia

<sup>2</sup> Center for Precision Genome Editing and Genetic Technologies for Biomedicine, Institute of Gene Biology, Russian Academy of Sciences, 34/5 Vavilov St., Moscow 119334, Russia

\* Correspondence: georgiev\_p@mail.ru (P.G.); bonchuk\_a@genebiology.ru (A.B.)

**Supplementary Table S1.** Oligonucleotides used for cloning and EMSA. Protein binding sites are shown in bold.

*1.1. Oligonucleotides used for cloning*

|               |                                  |
|---------------|----------------------------------|
| Kaiso_P523Q_d | GTATCAGTGCCGTTACTGT              |
| Kaiso_P523Q_r | ACAGTAACGGCACTGATAC              |
| Kaiso_P577A_d | GATGCTTCTGGGGACTCA               |
| Kaiso_P577A_r | TGAGTCCCCAGAAGCATC               |
| Kaiso_P588A_d | CATGCATGCAGGTCTTTAC              |
| Kaiso_P588A_r | GTAAAGACCTGCATGCATG              |
| Kaiso_P588V_d | CATGTATGCAGGTCTTTAC              |
| Kaiso_P588V_r | GTAAAGACCTGCATACATG              |
| Kaiso_579_r   | TTGTCGACTTACCCAGAAGGATCTTGACTA   |
| Kaiso_593_r   | TTGTCGACTTATTGTAAAGACCTGCATGGAT  |
| Kaiso_604_r   | TTGTCGACTTATGATCTATCGGAAAGATATGC |
| Kaiso_472_d   | TTGAATTCGCAAACAAACGTATGAAAGTA    |

*1.2. DNA probes for EMSA*

Kaiso BSx3

AACAGCTATGACCATGATTACGCCAAGCTCGAAATTAACCCTCACTAAAGGGAACAAAAGCTGGAGCTCCACCG  
CGGTGGCGGCCGCTCTAGAACTAGTGCT**TCCTGCCA**ATAACGGTGCT**TCCTGCCA**ATAACGGTGCT**TCCTGCCA**  
ATAAGCTTATCGATACCGTCGACCTCGAGGGGGGGCCCGGTACCCAATTCGCCCTATAGTGAGTCGTATTACAA  
TTCAGTGCCGTCGTTTTAC

Pita BSx5 as nonspecific DNA

GTAAAACGACGGCCAGTGAGCGCGCGTAATACGACTCACTATAGGGCGAATTGGGTACCGGGCCCCCCTCGA  
GGTCGACGGTATCGATAAGCTTGATCTTT**AGCCAAGACGCGA****ACCCGAATCCG**AACTTT**AGCCAAGACGCGA**  
**ACCCGAATCCG**AACTTT**AGCCAAGACGCGA****ACCCGAATCCG**AACTTT**AGCCAAGACGCGA****ACCCGAATCCG**  
AACTTT**AGCCAAGACGCGA****ACCCGAATCCG**AAGATCTAATATCGAATTCCTGCAGCCCGGGGGATCCACTAG  
TTCTAGAGCGGCCGCCACCGCGGTGGAGCTCCAGCTTTTGTCCCTTTAGTGAGGGTTAATTCGAGCTTGCGG  
TAATCATGGTCATAGCTGTT

**Supplementary Table S2.** The presence of protein–DNA hydrogen bonds along last 90 ns of 100 ns molecular dynamics trajectories of Kaiso complexes with Kaiso binding sequence DNA. Only bonds with over 20% presence in wild-type protein are shown. Grey fill indicates H-bonds weakened 5x times or more compared to wild-type protein. Light grey fill indicates H-bonds weakened 2-5x times compared to wild-type protein.

| donor       | acceptor    | wt     | P523Q  | P577A  | P577 <sup>cis</sup> | P588A  | P588V  | P588 <sup>cis</sup> |
|-------------|-------------|--------|--------|--------|---------------------|--------|--------|---------------------|
| TYR550-Side | DA30-PO4    | 85.41% | 81.04% | 81.72% | 85.11%              | 85.91% | 88.22% | 68.06%              |
| TYR562-Side | DG31-PO4    | 77.72% | 74.75% | 76.12% | 67.03%              | 73.83% | 74.15% | 77.54%              |
| THR538-Side | DG28-PO4    | 72.43% | 72.46% | 69.73% | 61.04%              | 55.14% | 53.09% | 16.27%              |
| TYR584-Side | DA30-PO4    | 71.73% | 62.67% | 68.73% | 73.73%              | 68.73% | 72.65% | 66.77%              |
| ARG549-Side | DC29-PO4    | 67.93% | 85.83% | 67.03% | 60.24%              | 87.81% | 68.06% | 83.43%              |
| TYR536-Side | DC8-PO4     | 66.63% | 42.61% | 17.98% | 2.00%               | 0.90%  | 42.22% | 2.40%               |
| SER508-Side | DG10-PO4    | 63.84% | 57.78% | 62.14% | 61.94%              | 66.33% | 71.46% | 41.82%              |
| TYR503-Side | DT9-PO4     | 54.65% | 69.16% | 63.54% | 66.33%              | 69.63% | 65.17% | 66.97%              |
| ARG511-Side | DG10-Base   | 45.65% | 60.98% | 61.14% | 60.84%              | 62.54% | 49.50% | 45.51%              |
| ALA598-Main | DA14-Base   | 40.36% | 41.22% | 36.96% | 38.16%              | 43.86% | 43.01% | 3.69%               |
| ARG510-Side | DT25-PO4    | 39.56% | 34.03% | 8.49%  | 6.59%               | 16.08% | 0.20%  | 0.90%               |
| TYR522-Side | DG27-PO4    | 36.76% | 44.41% | 46.95% | 36.06%              | 33.67% | 10.18% | 38.12%              |
| TYR597-Side | DG28-Base   | 32.17% | 40.72% | 35.16% | 32.87%              | 0.60%  | 45.11% | 10.08%              |
| ARG475-Side | DC18-PO4    | 31.77% | 40.22% | 25.57% | 9.89%               | 6.59%  | 2.99%  | 6.69%               |
| SER567-Side | DC4-Base    | 30.27% | 60.68% | 56.84% | 0.00%               | 11.89% | 20.46% | 0.00%               |
| ARG501-Side | DT9-PO4     | 25.37% | 34.03% | 20.58% | 22.88%              | 25.37% | 24.35% | 24.45%              |
| ARG595-Side | DG27-Base   | 24.98% | 24.35% | 21.98% | 27.57%              | 11.09% | 27.15% | 2.30%               |
| DC29-Base   | GLU535-Side | 22.08% | 39.92% | 39.66% | 42.86%              | 42.66% | 19.16% | 44.71%              |
| LYS477-Side | DC18-PO4    | 20.78% | 16.57% | 0.10%  | 0.40%               | 8.89%  | 0.10%  | 27.84%              |

**Supplementary Table S3.** The presence of protein–DNA hydrogen bonds along last 90 ns of 100 ns molecular dynamics trajectories of Kaiso complexes with CG-methylated DNA. Only bonds with over 15% presence in wild-type protein (and the bond E535-5MC8, which was previously found to be important for specific methyl-DNA recognition) are shown. Designations are the same as in Supplementary Table 2.

| donor       | acceptor    | wt      | P577A    | P577 <sup>cis</sup> | P588A    | P588V   | P588 <sup>cis</sup> |
|-------------|-------------|---------|----------|---------------------|----------|---------|---------------------|
| ARG549-Side | 5MC30-PO4   | 100.00% | 100.00 % | 92.71%              | 100.00 % | 100.00% | 100.00 %            |
| ARG511-Side | DG9-Base    | 100.00% | 56.74%   | 43.66%              | 90.11%   | 70.83%  | 33.57%              |
| TYR503-Side | 5MC8- PO4   | 83.62%  | 79.82%   | 65.13%              | 80.02%   | 70.73%  | 82.52%              |
| THR538-Side | DG29-PO4    | 73.83%  | 31.37%   | 56.44%              | 71.13%   | 68.13%  | 4.30%               |
| TYR584-Side | DG31-PO4    | 73.13%  | 79.82%   | 63.74%              | 77.72%   | 76.72%  | 76.52%              |
| TYR562-Side | DG32- PO4   | 71.23%  | 70.93%   | 58.14%              | 64.94%   | 69.53%  | 65.73%              |
| TYR550-Side | DG31-Side   | 70.63%  | 68.93%   | 65.43%              | 69.03%   | 69.03%  | 60.04%              |
| TYR522-Side | 5MC28- PO4  | 63.44%  | 28.57%   | 39.76%              | 64.24%   | 43.96%  | 7.69%               |
| SER508-Side | 5MC8- PO4   | 37.36%  | 7.89%    | 0.0%                | 9.49%    | 0.10%   | 0.0%                |
| VAL504-Main | DG9- PO4    | 28.57%  | 52.05%   | 45.65%              | 47.35%   | 51.15%  | 61.64%              |
| ALA598-Main | DC13- PO4   | 24.48%  | 19.18%   | 25.97%              | 31.27%   | 14.69%  | 10.09%              |
| 5MC30-Side  | GLU535-Side | 24.48%  | 3.80%    | 10.89%              | 10.59%   | 17.88%  | 1.10%               |
| ARG595-Side | DG29-PO4    | 20.88%  | 1.90%    | 1.00%               | 9.09%    | 0.20%   | 8.09%               |
| ARG595-Side | 5MC28-Base  | 19.68%  | 28.17%   | 29.57%              | 26.57%   | 28.77%  | 17.58%              |
| SER578-Side | DG32- PO4   | 17.98%  | 1.70%    | 2.90%               | 1.40%    | 5.39%   | 0.60%               |
| TYR597-Side | DG29-Base   | 16.48%  | 16.58%   | 15.88%              | 26.17%   | 18.18%  | 25.47%              |
| CYS505-Main | DG9-PO4     | 15.98%  | 1.40%    | 2.60%               | 4.40%    | 1.00%   | 0.0%                |
| GLN563-Side | DT33-Base   | 14.79%  | 3.50%    | 5.39%               | 4.60%    | 5.59%   | 2.00%               |
| ...         |             |         |          |                     |          |         |                     |
| 5MC8-Side   | GLU535-Side | 1.70%   | 6.09%    | 6.19%               | 9.99%    | 1.50%   | 1.20%               |

**Supplementary Figure S1.** Multiple sequence alignment of C-terminal extensions of Kaiso proteins from 400 species of Vertebrates.

|                                      | P577  | P588            |
|--------------------------------------|-------|-----------------|
| Accipiter_nisus                      | HSQDP | SGDTKLYRLHPCRS  |
| Acinonyx_jubatus                     | HSQDP | SGDAKLYRLHPCRS  |
| Acrocephalus_arundinaceus            | HSQDP | SGDTKLYRLHPCRS  |
| Aegotheles_bennettii                 | HSQDP | SGDNKLYRLHPCRS  |
| Ailuropoda_melanoleuca               | HSQDP | SGDSKLYRLHPCRS  |
| Alca_torda                           | HSQDP | SGDTKLYRLHPCRS  |
| Aleadryas_rufinucha                  | HSQDP | SGDTKLYRLHPCRS  |
| Alligator_mississippiensis           | HSQDP | SGDAKLYRLHPCRS  |
| Alligator_sinensis                   | HSQDP | SGDAKLYRLHPCRS  |
| Alopecoenas_beccarii                 | HSQDP | SGDTKLYRLNPCRS  |
| Anas_platyrhynchos                   | HSQDP | SGDTKLYRLHPCRS  |
| Anas_platyrhynchos_platyrhynchos     | HSQDP | SGDTKLYRLHPCRS  |
| Anas_zonorhyncha                     | HSQDP | SGDTKLYRLHPCRS  |
| Anhinga_anhinga                      | HSQDP | SGDTKLYRLHPRSLR |
| Anolis_carolinensis                  | HSQDP | SGESKHYRLHPCRS  |
| Anser_brachyrhynchus                 | HSQDP | SGDTKLYRLHPCRS  |
| Anser_cygnoid                        | HSQDP | SGDTKLYRLHPCRS  |
| Anthoscopus_minutus                  | HSQDP | SGDTKLYRLHPCRS  |
| Aorycteropus_afer_afer               | HSQDP | SGDAKLYRLHPCRS  |
| Apaloderma_vittatum                  | HSQDP | SGDTKLYRLHPCRS  |
| Aphelocoma_coerulescens              | HSQDP | SGDTKLYRLHPCRS  |
| Aptenodytes_forsteri                 | HSQDP | SGDTKLYRLHPCRS  |
| Aptenodytes_patagonicus              | HSQDP | SGDTKLYRLHPCRS  |
| Aquila_chrysaetos_chrysaetos         | HSQDP | SGDTKLYRLHPCRS  |
| Aramus_guarauna                      | HSQDP | SGDTKLYRLHPCRS  |
| Ardeotis_kori                        | HSQDP | SGDTKLYRLHPCRS  |
| Arenaria_interpres                   | HSQDP | SGDTKLYRLHPCRS  |
| Asarcornis_scutulata                 | HSQDP | SGDTKLYRLHPCRS  |
| Athene_cunicularia                   | HSQDP | SGDTKLYRLHPCRS  |
| Atlantisia_rogersi                   | HSQDP | SGDTKLYRLHPCRS  |
| Aythya_fuligula                      | HSQDP | SGDTKLYRLHPCRS  |
| Balaeniceps_rex                      | HSQDP | SGDTKLYRLHPCRS  |
| Balaenoptera_acutorosUrsus_maritimus | HSQDP | SGDSKLYRLHPCRS  |
| Balaenoptera_musculus                | HSQDP | SGDSKLYRLHPCRS  |
| Balaenoptera_physalus                | HSQDP | SGDSKLYRLHPCRS  |
| Balearica_regulorum_gibbericeps      | HSQDP | SGDTKLYRLHPCRS  |
| Baryphthengus_martii                 | HSQDP | SGDTKLYRLHPCRS  |
| Bison_bison_bison                    | HSQDP | SGDSKLYRLHPCRS  |
| Bombycilla_garrulus                  | HSQDP | SGDTKLYRLHPCSLR |
| Bos_indicus_x_Bos_taurus             | HSQDP | SGDSKLYRLHPCRS  |
| Bos_mutus                            | HSQDP | SGDSKLYRLHPCRS  |
| Bos_taurus                           | HSQDP | SGDSKLYRLHPCRS  |
| Bubo_bubo                            | HSQDP | SGDTKLYRLHPCRS  |
| Buphagus_erythrorhynchus             | HSQDP | SGDTKLYRLHPCSLR |
| Burhinus_bisSinosuthora_webbiana     | HSQDP | SGDTKLYLLHPCRS  |
| Buteo_japonicus                      | HSQDP | SGDTKLYRLHPCRS  |
| Cairina_moschata_domestica           | HSQDP | SGDTKLYRLHPCRS  |
| Calcarius_ornatus                    | HSQDP | SGDTKLYRLHPCRS  |
| Calidris_pygmaea                     | HSQDP | SGDTKLYRLHPCRS  |
| Callaeas_wilsoni                     | HSQDP | SGDTKLYRLHPCRS  |
| Callorhinus_ursinus                  | HSQDP | SGDSKLYRLHPCRS  |
| Caloenas_nicobarica                  | HSQDP | SGDTKLYRLNPCRS  |
| CalonecFregetta_grallaria            | HSQDP | SGDTKLYRLHPCRS  |
| Camelus_dromedarius                  | HSQDP | SGDSKLYRLHPCRS  |
| Camelus_ferus                        | HSQDP | SGDSKLYRLHPCRS  |
| Campylorhamphus_procurvoides         | HSQDP | SGDTKLYRLHPCRS  |
| Canis_lupus_dingo                    | HSQDP | SGDSKLYRLHPCRS  |

|                                 |       |      |          |          |      |    |
|---------------------------------|-------|------|----------|----------|------|----|
| Canis_lupus_familiaris          | HSQDP | SGDS | SKLYRLHP | PCRS     | LQ   |    |
| Canis_lupus_familiaris_0        | HSQDP | SGDS | SKLYRLHP | PCRS     | LQ   |    |
| Canis_lupus_familiaris_1        | HSQDP | SGDS | SKLYRLHP | PCRS     | LQ   |    |
| Capra_hircus                    | HSQDP | SGDS | SKLYRLHP | PCRS     | LQ   |    |
| Cardinalis_cardinalis           | HSQDP | SGDT | TKLYRLHP | PCRS     | LQ   |    |
| Cariama_cristata                | HSQDP | SGDT | TKLYRLHP | PCRS     | LQ   |    |
| Catagonus_wagneri               | HSQDP | SGDS | SKLYRLHP | PCRS     | LQ   |    |
| Catharus_fuscescens             | HSQDP | SGDT | TKLYRLHP | PCRS     | LQ   |    |
| Catharus_ustulatus              | HSQDP | SGDT | TKLYRLHP | PCRS     | LQ   |    |
| Cavia_porcellus                 | HSQDP | SGDS | SKLYRLHP | CKSL     | LQ   |    |
| Cephalopterus_ornatus           | HSQDP | SGE  | TKLYRLHP | PCRS     | LQ   |    |
| Cepphus_grylle                  | HSQDP | SGDT | TKLYRLHP | PCRS     | LQ   |    |
| Certhia_brachydactyla           | HSQDP | SGDT | TKLYRLHP | PCRS     | LQ   |    |
| Certhia_familiaris              | HSQDP | SGDT | TKLYRLHP | PCRS     | LQ   |    |
| Cettia_cetti                    | HSQDP | SGDT | TKLYRLHP | PCRS     | LQ   |    |
| Chaetorhynchus_papuensis        | HSQDP | SGDT | TKLYRLHP | PCRS     | LQ   |    |
| Charadrius_vociferus            | HSQDP | SGDT | TKLYRLHP | PCRS     | LQ   |    |
| Chauna_torquata                 | HSQDP | SGDA | KLYRLHP  | PCRS     | LQ   |    |
| Chelonia_mydas                  | HSQDP | SGDT | TKLYRLHP | PCRS     | LQ   |    |
| Chelonoidis_abingdonii          | HSQDP | SGDT | TKLYRLHP | PCRS     | LQ   |    |
| Chelydra_serpentina             | HSQDP | SGDT | TKLYRLHP | PCRS     | LQ   |    |
| Chinchilla_lanigera             | HSQDP | SGDS | SKLYRLHP | CKSL     | LQ   |    |
| Chlamydotis_macqueenii          | HSQDP | SGDT | TKLYRLHP | PCRS     | LQ   |    |
| Chloebia_gouldiae               | HSQDP | SGDT | TKLYRLHP | PCRS     | LQ   |    |
| Chloropsis_cyanopogon           | HSQDP | SGNT | TKLYRLHP | PCRS     | LQ   |    |
| Chloropsis_hardwickii           | HSQDP | SGNT | TKLYRLHP | PCRS     | LQ   |    |
| Chordeiles_acutipennis          | HSQDP | SGDT | TKLYRLHP | PCRS     | LQ   |    |
| Chroicocephalus_maculipennis    | HSQDP | SGDT | TKLYRLHP | PCRS     | LQ   |    |
| Chrysemys_picta_bellii          | HSQDP | SGDT | TKLYRLHP | PCRS     | LQ   |    |
| Chunga_burmeisteri              | HSQDP | SGDT | TKLYRLHP | PCRS     | LQ   |    |
| Ciccaba_nigrolineata            | HSQDP | SGDT | TKLYRLHP | PCRS     | LQ   |    |
| Ciconia_maguari                 | HSQDP | SGDT | TKLYRLHP | PCRS     | LQ   |    |
| Cinclus_mexicanus               | HSQDP | SGNT | TKLYRLHP | PCRS     | LQ   |    |
| Circaetus_pectoralis            | HSQDP | SGDT | TKLYRLHP | PCRS     | LQ   |    |
| Cisticola_juncidis              | HSQDP | SGDT | TKLYRLHP | PCRS     | LQ   |    |
| Climacteris_rufus               | HSQDP | SGDT | TKLYRLHP | PCRS     | LQ   |    |
| Cnemophilus_loriae              | HSQDP | SGDT | TKLYRLHP | PCRS     | LQ   |    |
| Cochlearius_cochlearius         | HSQDP | SGDT | TKLYRLHP | PCRS     | LQ   |    |
| Columbina_picui                 | HSQDP | SGDT | TKLYRLN  | PCRS     | LH   |    |
| Copsychus_sechellarum           | HSQDP | SGDT | TKLYRLHP | PCRS     | LQ   |    |
| Corvus_brachyrhynchos           | HSQDP | SGDT | TKLYRLHP | PCRS     | LQ   |    |
| Corvus_moneduloides             | HSQDP | SGDT | TKLYRLHP | PCRS     | LQ   |    |
| Corythaeola_cristata            | HSQDP | SGDT | TKLYRLHP | PCRS     | LQ   |    |
| Corythaixoides_concolor         | HSQDP | SGE  | TKLYRLHP | PCRS     | LQ   |    |
| Crocodylus_porosus              | HSQDP | SGDA | KLYRLHP  | PCRS     | LQ   |    |
| Crocota_crocota                 | HSQDP | SGDA | KLYRLHP  | PCRS     | LQ   |    |
| Cyanistes_caeruleus             | HSQDP | SGDT | TKLYRLHP | PCRS     | LQ   |    |
| Cyanoderma_ruficeps             | HSQDP | SGDT | TKLYRLHP | PCRS     | LQ   |    |
| Cyanoderma_ruficeps_0           | HSQDP | SGDT | TKLYRLHP | PCRS     | LQ   |    |
| Daphoenositta_chrysoptera       | HSQDP | SGDT | TKLYRLHP | PCRS     | LQ   |    |
| Dasyornis_broadbenti            | HSQDP | SGDT | TKLYRLHP | PCRS     | LQ   |    |
| Dicaeum_eximium                 | HSQDP | SGDT | TKLYRLHP | PCRS     | LQ   |    |
| Dicrurus_megarhynchus           | HSQDP | SGDT | TKLYRLHP | PCRS     | LQ   |    |
| Donacobius_aVidua_chalybeata    | HSQDP | SGDT | TKLYRLHP | PCRS     | LQ   |    |
| Dromas_ardeola                  | HSQDP | SGDT | TKLYRLHP | CKSL     | LQ   |    |
| Drymodes_brunneopygia           | HSQDP | SGDT | TKLYRLHP | PCRS     | LQ   |    |
| Dryoscopus_gambensis            | HSQDP | SGDT | TKLYRLHP | PCRS     | LQ   |    |
| Edolisoma_coerulescens          | HSQDP | SGDT | TKLYRLHP | PCRS     | LQ   |    |
| Egretta_garzetta                | HSQDP | SGDT | TKLYRLHP | PCRS     | LQ   |    |
| Elachura_formosa                | HSQDP | SGDT | TKLYRLHP | PCRS     | LQ   |    |
| Emberiza_fucata                 | HSQDP | SGDT | TKLYRLHP | PCRS     | LQ   |    |
| Enhydra_luDelphinapterus_leucas | HSQDP | SGDS | SKLYRLHP | PCRS     | LQ   |    |
| Equus_asinus_asinus             | HSQDP | SGDS | SKLYRLHP | PCRS     | LQ   |    |
| Erithacus_rubecula              | HSQ   | E    | PSGDT    | TKLYRLHP | PCRS | LQ |

|                                        |       |     |           |    |    |
|----------------------------------------|-------|-----|-----------|----|----|
| Erpornis_zantholeuca                   | HSQDP | SGD | TKLYRLHPC | RS | LQ |
| Erythrocerus_mccallii                  | HSQDP | SGD | TKLYRLHPC | RS | LQ |
| Eschrichtius_robustus                  | HSQDP | SGD | SKLYRLHPC | RS | LQ |
| Eudytes_chrysocome                     | HSQDP | SGD | TKLYRLHPC | RS | LQ |
| Eudytes_filholi                        | HSQDP | SGD | TKLYRLHPC | RS | LQ |
| Eudytes_robustus                       | HSQDP | SGD | TKLYRLHPC | RS | LQ |
| Eudytes_sclateri                       | HSQDP | SGD | TKLYRLHPC | RS | LQ |
| Eudyptula_minor                        | HSQDP | SGD | TKLYRLHPC | RS | LQ |
| Eulacestoma_nigropectus                | HSQDP | SGD | TKLYRLHPC | RS | LQ |
| Eurypyga_helias                        | HSQDP | SGD | TKLYRLHPC | RS | LQ |
| Eurystomus_gularis                     | HSQDP | SGD | TKLYRLHPC | RS | LQ |
| Falco_tinnunculus                      | HSQDP | SGD | TKLYRLHPC | RS | LQ |
| Falcunculus_frontatus                  | HSQDP | SGD | TKLYRLHPC | RS | LQ |
| Felis_catus                            | HSQDP | SGD | SKLYRLHPC | RS | LQ |
| Ficedula_albicollis                    | HSQDP | SGD | TKLYRLHPC | RS | LQ |
| Formicarius_rufipectus                 | HSQDP | SGD | TKLYRLHPC | RS | LR |
| Fregata_magnificens                    | HSQDP | SGD | TKLYRLHPC | RS | LQ |
| Fukomys_damarensis                     | HSQDP | SGD | SKLYRLHPC | KS | LQ |
| Fulmarus_glacialis                     | HSQDP | SGD | TKLYRLHPC | RS | LQ |
| Furnarius_figulus                      | HSQDP | SGD | TKLYRLHPC | RS | LQ |
| Gavia_stellata                         | HSQDP | SGD | TKLYRLHPC | RS | LQ |
| GeoGeoMyotis_myotis                    | HSQDP | SGD | SKLYRLHPC | RS | LQ |
| Geospiza_fortis                        | HSQDP | SGD | TKLYRLHPC | RS | LQ |
| Geospiza_parvula                       | HSQDP | SGD | TKLYRLHPC | RS | LQ |
| Glareola_pratincola                    | HSQDP | SGD | TKLYRLHPC | KS | LQ |
| Glaucidium_brasilianum                 | HSQDP | SGD | TKLYRLHPC | RS | LQ |
| Gopherus_agassizii                     | HSQDP | SGD | TKLYRLHPC | RS | LQ |
| Gopherus_evgoodei                      | HSQDP | SGD | TKLYRLHPC | RS | LQ |
| Gorilla_gorilla_gorilla                | HSQDP | SGD | SKLYRLHPC | KS | LQ |
| Grallaria_varia                        | HSQDP | SGD | TKLYRLHPC | RS | LQ |
| Grantiella_picta                       | HSQDP | SGD | TKLYRLHPC | RS | LR |
| Grus_americana                         | HSQDP | SGD | TKLYRLHPC | RS | LQ |
| Gulo_gulo                              | HSQDP | SGD | SKLYRLHPC | RS | LQ |
| Gymnorhina_tibicen                     | HSQDP | SGD | TKLYRLHPC | RS | LQ |
| Halcyon_senegalensis                   | HSQDP | SGD | TKLYRLHPC | RS | LQ |
| Haliaeetus_albicilla                   | HSQDP | SGD | TKLYRLHPC | RS | LQ |
| Heliornis_fulica                       | HSQDP | SGD | TKLYRLHPC | RS | LQ |
| Hemiprocne_comata                      | HSQDP | SGD | TKLYRLHPC | RS | LQ |
| Herpetotheres_cachinnans               | HSQDP | SGD | TKLYRLHPC | RS | LQ |
| Himantopus_himantopus                  | HSQDP | SGD | TKLYRLHPC | RS | LQ |
| Hippolais_icterina                     | HSQDP | SGD | TKLYRLHPC | RS | LQ |
| Hipposideros_armiger                   | HSQDP | SGE | SKLYRLHPC | RS | LQ |
| Hirundo_rustica_rustica                | HSQDP | SGD | TKLYRLHPC | RS | LQ |
| Homo_sapiens                           | HSQDP | SGD | SKLYRLHPC | KS | LQ |
| Horornis_vulcanius                     | HSQDP | SGD | TKLYRLHPC | RS | LQ |
| Hypotaenidia_okinawae                  | HSQDP | SGD | TKLYRLHPC | RS | LQ |
| Ibidorhyncha_sThryothorus_ludovicianus | HSQDP | SGE | TKMYRLHPC | RS | LQ |
| Ifrita_kowaldi                         | HSQDP | SGD | TKLYRLHPC | RS | LQ |
| Irena_cyanogasAnseranas_semipalmata    | HSQDP | SGD | TKLYRLHPC | RS | LQ |
| Jacana_jacana                          | HSQDP | SGD | TKLYRLHPC | RS | LQ |
| Junco_hyemalis                         | HSQDT | SGD | TKLYRLHPC | RS | LQ |
| Lamprotornis_superbus                  | HSQDP | SGD | TKLYRLHPC | RS | LR |
| Lanius_ludovicianus                    | HSQDP | SGD | TKLYRLHPC | RS | LQ |
| Larus_smithsonianus                    | HSQDP | SGD | TKLYRLHPC | RS | LQ |
| Leiothrix_lutea                        | HSQDP | SGD | TKLYRLHPC | RS | LQ |
| Lepidothrix_coronata                   | HSQDP | SGD | TKLYRLHPC | RS | LQ |
| Leptocoma_aspasia                      | HSQDP | SGD | TKLYRLHPC | RS | LQ |
| Leptonychotes_weddellii                | HSQDP | SGD | SKLYRLHPC | RS | LQ |
| Leptosomus_discolor                    | HSQDP | SGD | TKLYRLHPC | RS | LQ |
| Leucopsar_rothschildi                  | HSQDP | SGD | TKLYRLHPC | RS | LR |
| Limosa_lapponica_baueri                | HSQDP | SGD | TKLYRLHPC | RS | LQ |
| Lipotes_vexillifer                     | HSQDP | SGD | SKLYRLHPC | RS | LQ |
| Locustella_ochotensis                  | HSQDP | SGD | TKLYRLHPC | RS | LQ |
| Lonchura_striata_domestica             | HSQDP | SGD | TKLYRLHPC | RS | LQ |

|                                             |       |      |      |      |      |    |
|---------------------------------------------|-------|------|------|------|------|----|
| Lophotis_ruficrista                         | HSQDP | SGDT | TKLY | RLHP | PCRS | LQ |
| Loxia_curvirostris                          | HSQDP | SGDT | TKLY | RLHP | PCRS | LQ |
| Loxia_leucoptera                            | HSQDP | SGDT | TKLY | RLHP | PCRS | LQ |
| Lynx_canadensis                             | HSQDP | SGDA | KLYR | RLHP | PCRS | LQ |
| Lynx_pardinus                               | HSQDP | SGDA | KLYR | RLHP | PCRS | LQ |
| Machaerirhynchus_nigripes                   | HSQDP | SGDT | TKLY | RLHP | PCRS | LQ |
| Malurus_cyaneus_samuelsi                    | HSQDP | SGDT | TKLY | RLHP | PCRS | LQ |
| Malurus_elegans                             | HSQDP | SGDT | TKLY | RLHP | PCRS | LQ |
| Marmota_monax                               | HSQDP | SGDS | SKLY | RLHP | CKSL | LQ |
| Marmota_monax_0                             | HSQDP | SGDS | SKLY | RLHP | CKSL | LQ |
| Melospiza_melodia                           | HSQDP | SGDT | TKLY | RLHP | PCRS | LQ |
| Mesembrinibia_cayennensis                   | HSQDP | SGDT | TKLY | RLHP | PCRS | LQ |
| Mesitornis_unicolor                         | HSQDP | SGDT | TKLY | RLHP | PCRS | LQ |
| Microcaecilia_unicolor                      | HSQDP | SGDS | SKLY | RLHP | PCRS | LQ |
| Mionectes_macconnelli                       | HSQDP | SGDT | TKLY | RLHP | PCRS | LQ |
| Molossus_molossus                           | HSQDP | SGDS | SKLY | RLHP | PCRS | LQ |
| Molothrus_ater                              | HSQDP | SGDT | TKLY | RLHP | PCRS | LQ |
| Monodon_monoceros                           | HSQDP | SGDS | SKLY | RLHP | PCRS | LQ |
| Moschus_moschiferus                         | HSQDP | SGDS | SKLY | RLHP | PCRS | LQ |
| Motacilla_alba                              | HSQDP | SGDT | TKLY | RLHP | PCRS | LQ |
| Muntiacus_muntjak                           | HSQDP | SGDS | SKLY | RLHP | PCRS | LQ |
| Muntiacus_reevesi                           | HSQDP | SGDS | SKLY | RLHP | PCRS | LQ |
| Mus_caroli                                  | HSQDP | SGDS | SKLY | RLHP | CKSL | LQ |
| Mus_musculus                                | HSQDP | SGDS | SKLY | RLHP | CKSL | LQ |
| Mus_musculus_0                              | HSQDP | SGDS | SKLY | RLHP | CKSL | LQ |
| Mus_spicilegus                              | HSQDP | SGDS | SKLY | RLHP | CKSL | LQ |
| Myiagra_hebetior                            | HSQDP | SGDT | TKLY | RLHP | PCRS | LQ |
| Myotis_brandtii                             | HSQDP | SGDS | SKLY | RLHP | PCRS | LQ |
| Myotis_davidii                              | HSQDP | SGDS | SKLY | RLHP | PCRS | LQ |
| Myotis_lucifugus                            | HSQDP | SGDS | SKLY | RLHP | PCRS | LQ |
| Mystacornis_crossleyi                       | HSQDP | SGDT | TKLY | RLHP | PCRS | LQ |
| Nannospalax_galili                          | HSQDP | SGDS | SKLY | RLHP | CKSL | LQ |
| Neomonachus_schauinslandi                   | HSQDP | SGDS | SKLY | RLHP | PCRS | LQ |
| Neophocaena_asiaeorientalis_asiaeorientalis | HSQDP | SGDS | SKLY | RLHP | PCRS | LQ |
| Neopipo_cinnamomea                          | HSQDP | SGDT | TKLY | RLHP | PCRS | LQ |
| Neovison_vison                              | HSQDP | SGDS | SKLY | RLHP | PCRS | LQ |
| Neovison_vison_0                            | HSQDP | SGDS | SKLY | RLHP | PCRS | LQ |
| Nicator_chloris                             | HSQDP | SGDT | TKLY | QLHP | PCRS | LQ |
| Nipponia_nippon                             | HSQDP | SGDT | TKLY | RLHP | PCRS | LQ |
| Notiomystis_cincta                          | HSQDP | SGDT | TKLY | RLHP | PCRS | LQ |
| Nyctereutes_procyonoides                    | HSQDP | SGDS | SKLY | RLHP | PCRS | LQ |
| Nyctibius_bracteatus                        | HSQDP | SGDT | TKLY | RLHP | PCRS | LQ |
| Nyctibius_grandis                           | HSQDP | SGDT | TKLY | RLHP | PCRS | LQ |
| Nycticyphes_semicollaris                    | HSQDP | SGDT | TKLY | RLHP | PCRS | LQ |
| Nyctiprogne_leucopygia                      | HSQDP | SGDT | TKLY | RLHP | PCRS | LQ |
| Oceanites_oceanicus                         | HSQDP | SGDT | TKLY | RLHP | PCRS | LQ |
| Oceanodroma_tethys                          | HSQDP | SGDT | TKLY | RLHP | PCRS | LQ |
| Octodon_degus                               | HSQDP | SGDS | SKLY | RLHP | CKSL | LQ |
| Odobenus_rosmarinus_divergens               | HSQDP | SGDS | SKLY | RLHP | PCRS | LQ |
| Oenanthe_oenanthe                           | HSQDP | SGDT | TKLY | RLHP | PCRS | LQ |
| Onychorhynchus_coronatus                    | HSQDP | SGDT | TKLY | RLHP | PCRS | LQ |
| Opisthocomus_hoazin                         | HSQDP | SGDT | TKLY | RLNP | PCRS | LQ |
| Oreocharis_arfaki                           | HSQDP | SGDT | TKLY | RLHP | PCRS | LQ |
| Origma_solitaria                            | HSQDP | SGDT | TKLY | RLHP | PCRS | LQ |
| Oriolus_oriolus                             | HSQDP | SGDT | TKLY | RLHP | PCRS | LQ |
| Ornithorhynchus_anatinus                    | HSQDP | SGDT | TKLY | RLHP | PCRS | LQ |
| Otus_sunia                                  | HSQDP | SGDT | TKLY | RLHP | PCRS | LQ |
| Ovis_aries                                  | HSQDP | SGDS | SKLY | RLHP | PCRS | LQ |
| Ovis_aries_0                                | HSQDP | SGDS | SKLY | RLHP | PCRS | LQ |
| Oxylabes_madagascariensis                   | HSQDP | SGDT | TKLY | RLHP | PCRS | LQ |
| Oxyruncus_cristatus                         | HSQDP | SGDT | TKLY | RLHP | PCRS | LQ |
| Pachycephala_philippinensis                 | HSQDP | SGDT | TKLY | RLHP | PCRS | LQ |
| Pachyramphus_minor                          | HSQDP | SGDT | TKLY | RLHP | PCRS | LQ |
| Pan_paniscus                                | HSQDP | SGDS | SKLY | RLHP | PCRS | LQ |



|                                          |       |      |          |      |     |
|------------------------------------------|-------|------|----------|------|-----|
| Pan_Panthera_pardus                      | HSQDP | SGDA | AKLYRLHP | PCRS | LQ  |
| Pandion_haliaetus                        | HSQDP | SGDT | TKLYRLHP | PCRS | LQ  |
| Panthera_leo                             | HSQDP | SGDA | AKLYRLHP | PCRS | LQ  |
| Panthera_tigris_altaica                  | HSQDP | SGDA | AKLYRLHP | PCRS | LQ  |
| Panurus_biarmicus                        | HSQDP | SGDT | TKLYRLHP | PCRS | LQ  |
| Panurus_biarmicus_0                      | HSQDP | SGDT | TKLYRLHP | PCRS | LQ  |
| Pardalotus_punctatus                     | HSQDP | SGDT | TKLYRLHP | PCRS | LQ  |
| Patagioenas_fasciata_monilis             | HSQDP | SGDT | TKLYRLHP | PCRS | LQ  |
| Patagioenas_fasciata_monilis_0           | HSQDP | SGDT | TKLYRLHP | PCRS | LQ  |
| Pedionomus_torquatus                     | HSQDP | SGDT | TKLYRLHP | PCRS | LQ  |
| Pelecanoides_urinaPluvianellus_socialis  | HSQDP | SGDT | TKLYRLHP | PCRS | LQ  |
| Pelecanus_crispus                        | HSQDP | SGDT | TKLYRLHP | PCRS | LQ  |
| Pelodiscus_sinensis                      | HSQDP | SGDT | TKLYRLHP | PCRS | LQ  |
| Pelusios_castaneus                       | HSQDP | SGDT | TKLYRLHP | PCRS | LQ  |
| Peucedramus_taeniatus                    | HSQDP | SGDT | TKLYRLHP | PCRS | LQ  |
| Phaetusa_simplex                         | HSQDP | SGDT | TKLYRLHP | PCRS | LQ  |
| Phainopepla_nitens                       | HSRDP | SGDT | TKLYRLHP | PCRS | LR  |
| Phalacrocorax_carbo                      | HSQDP | SGDT | TKLYRLHP | PCRS | LQ  |
| Phocoena_sinus                           | HSQDP | SGD  | SKLYRLHP | PCRS | LQ  |
| Phyllostomus_discolor                    | HSQDP | SGD  | SKLYRLHP | PCRS | LQ  |
| Pipra_filicauda                          | HSQDP | SGDT | TKLYRLHP | PCRS | LQ  |
| Piprites_chloris                         | HSQDP | SGDT | TKLYRLHP | PCRS | LQ  |
| Platysteira_castanea                     | HSQDP | SGDT | TKLYRLHP | PCRS | LQ  |
| Platysternon_megacephalum                | HSQDP | SGDT | TKLYRLHP | PCRS | LQ  |
| Ploceus_nigricollis                      | HSQDP | SGDT | TKLYRLHP | PCRS | LQ  |
| Podargus_sScopus_umbretta                | HSQDP | SGDT | TKLYRLHP | PCRS | LQ  |
| Podilymbus_podiceps                      | HSQDP | SGDT | TKLYRLHP | PCRS | LQ  |
| Poecile_aNesospiza_acunhae               | HSQDP | SGDT | TKLYRLHP | PCRS | LQ  |
| Pogona_vitticeps                         | HSQDP | SGE  | SKLYRLHP | PCRS | LQ  |
| Polioptila_caerulea                      | HSQDP | SGDT | TKLYRLHP | PCRS | LQ  |
| Pomatorhinus_ruficollis                  | HSQDP | SGDT | TKLYRLHP | PCRS | LQ  |
| Pomatostomus_ruficeps                    | HSQDP | SGE  | TKLYRLHP | PCRS | LQ  |
| Promerops_cafer                          | HSQDP | SGDT | TKLYRLHP | PCRS | LQ  |
| Propithecus_coquereli                    | HSQDP | SGD  | SKLYRLHP | PCRS | LQ  |
| Prunella_fulvescens                      | HSQDP | SGDT | TKLYRLHP | PCRS | LQ  |
| Prunella_himalayana                      | HSQDP | SGDT | TKLYRLHP | PCRS | LQ  |
| Psophia_crepitans                        | HSQDP | SGDT | TKLYRLHP | PCRS | LQ  |
| Pterocles_burchelli                      | HSQDP | SGDT | TKLYRLHP | PCRS | LQ  |
| Pterocles_gutturalis                     | HSQDP | SGDT | TKLYRLHP | PCRS | LQ  |
| Pteropus_alecto                          | HSQDP | SGD  | SKLYRLHP | PCRS | LQ  |
| Pteropus_vampyrus                        | HSQDP | SGD  | SKLYRLHP | PCRS | LQ  |
| Pteruthius_melanotis                     | HSQDP | SGDT | TKLYRLHP | PCRS | LQ  |
| Ptilonorhynchus_violaceus                | HSQDP | SGDT | TKLYRLHP | PCRS | LQ  |
| Ptilorrhoa_leucosticta                   | HSQDP | SGDT | TKLYRLHP | PCRS | LQ  |
| Puma_concolor                            | HSQDP | SGDA | AKLYRLHP | PCRS | LQ  |
| Pygoscelis_adeliae                       | HSQDP | SGDT | TKLYRLHP | PCRS | LQ  |
| Quiscalus_mexicanus                      | HSQDP | SGDT | TKLYRLHP | PCRS | LQ  |
| Rattus_norvegicus                        | HSQDP | SGD  | SKLYRLHP | CK   | SLQ |
| Rhabdornis_inornatus                     | HSQDP | SGDT | TKLYRLHP | PCRS | LR  |
| Rhadina_sibilaHypocryptadius_cinnamomeus | HSQDP | SGDT | TKLYRLHP | PCRS | LQ  |
| Rhagologus_leucostigma                   | HSQDP | SGDT | TKLYRLHP | PCRS | LQ  |
| Rhegmatorhina_hoffmannsi                 | HSQDP | SGDT | TKLYRLHP | PCRS | LQ  |
| Rhinolophus_ferrumequinum                | HSQDP | SGE  | SKLYRLHP | PCRS | LQ  |
| Rhipidura_dahli                          | HSQDP | SGDT | TKLYRLHP | PCRS | LQ  |
| Rhodinocichla_rosea                      | HSQDP | SGDT | TKLYRLHP | PCRS | LQ  |
| Rhynchotos_jubatus                       | HSQDP | SGDT | TKLYRLHP | PCRS | LQ  |
| Rissa_Uria_aalge                         | HSQDP | SGDT | TKLYRLHP | PCRS | LQ  |
| RosTrogon_melanurus                      | HSQDP | SGDT | TKLYRLHP | PCRS | LQ  |
| Rousettus_aegyptiacus                    | HSQDP | SGD  | SKLYRLHP | PCRS | LQ  |
| Rynchops_niger                           | HSQDP | SGDT | TKLYRLHP | PCRS | LQ  |
| Sagittarius_serpentarius                 | HSQDP | SGDT | TKLYRLHP | PCRS | LQ  |
| Sakesphorus_luctuosus                    | HSQDP | SGDT | TKLYRLHP | PCRS | LQ  |
| Salvator_merianae                        | HSQDP | SGE  | SKMYRLHP | PCRS | LQ  |
| Sciurus_vulgaris                         | HSQDP | SGD  | SKLYRLHP | CK   | SLQ |

|                                  |                                |       |           |           |    |
|----------------------------------|--------------------------------|-------|-----------|-----------|----|
| Sclerurus_mexicanus              | HSQDP                          | SGD   | TKLYRLHPC | RS        | LQ |
| Scytalopus_superciliaris         | HSQDP                          | SGD   | TKLYRLHPC | RS        | LQ |
| Serinus_canaria                  | HSQDP                          | SGD   | TKLYRLHPC | RS        | LQ |
| Setophaga_kirtlandii             | HSQDP                          | SGD   | TKLYRLHPC | RS        | LQ |
| Sitta_europaea                   | HSQDP                          | SGD   | TKLYRLHPC | RS        | LQ |
| Smutsornis_africanus             | HSQDP                          | SGD   | AKLYRLHPC | KS        | LQ |
| SOrthonyx_spaldingii             | HSQDP                          | SGD   | TKLYRLHPC | RS        | LQ |
| Spheniscus_mendiculus            | HSQDP                          | SGD   | TKLYRLHPC | RS        | LQ |
| Spizaetus_tyrannus               | HSQDP                          | SGD   | TKLYRLHPC | RS        | LQ |
| Spizella_passerina               | HSQDP                          | SGD   | TKLYRLHPC | RS        | LQ |
| SSus_scrofa                      | HSQDP                          | SGD   | SKLYRLHPC | RS        | LQ |
| Steatornis_caripensis            | HSQDP                          | SGD   | TKLYRLHPC | RS        | LQ |
| Stercorarius_parasiticus         | HSQDP                          | SGD   | TKLYRLHPC | RS        | LQ |
| Sula_dactyla                     | Picathartes_gymnocephalus      | HSQDP | SGD       | TKLYRLHPC | RS |
| Suricata_suricatta               | HSQDP                          | SGD   | AKLYRLHPC | RS        | LQ |
| Sus_scrofa                       | HSQDP                          | SGD   | SKLYRLHPC | RS        | LQ |
| Sus_scrofa_0                     | HSQDP                          | SGD   | SKLYRLHPC | RS        | LQ |
| Sylvia_aChionis_minor            | HSQDP                          | SGD   | TKLYRLHPC | RS        | LQ |
| Syrrhaptes_paradoxus             | HSQDP                          | SGD   | TKLYRLHPC | RS        | LQ |
| Tachuris_rubrigas                | Regulus_saBucorvus_abyssinicus | HSQDP | SGD       | TKLYRLHPC | RS |
| Taeniopygia_guttata              | HSQDP                          | SGD   | TKLYRLHPC | RS        | LQ |
| Taeniopygia_guttata_0            | HSQDP                          | SGD   | SKLYRLHPC | RS        | LQ |
| Tauraco_erythrolophus            | HSQDP                          | SGD   | TKLYRLHPC | RS        | LQ |
| Terrapene_carolina               | Bos_mutus                      | HSQDP | SGD       | SKLYRLHPC | RS |
| Thalassarche_chlororhynchus      | HSQDP                          | SGD   | TKLYRLHPC | RS        | LQ |
| Thinocorus_orbignyianus          | HSQDP                          | SGD   | TKLYRLHPC | KS        | LQ |
| Tichodroma_muraria               | HSQDP                          | SGD   | TKLYRLHPC | RS        | LQ |
| Todus_mexicanus                  | HSQDP                          | SGD   | TKLYRLHPC | RS        | LQ |
| Toxostoma_redivivum              | HSQDP                          | SGD   | TKLYRLHPC | RS        | L  |
| Tupaia_chinensis                 | HSQDP                          | SGD   | AKLYRLHPC | RS        | LQ |
| Tursiops_Physeter_macrocephalus  | HSQDP                          | SGD   | SKLYRLHPC | RS        | LQ |
| Tychaemon_coryphoeus             | HSQDP                          | SGD   | TKLYRLHPC | RS        | LQ |
| Tyrannus_savana                  | HSQDP                          | SGD   | TKLYRLHPC | RS        | LQ |
| Urocitellus_parryii              | HSQDP                          | SGD   | SKLYRLHPC | KS        | LQ |
| Urocolius_indicus                | HSQDP                          | SGD   | TKLYRLHPC | RS        | LQ |
| Urocynchramus_pylzowi            | HSQDP                          | SGD   | TKLYRLHPC | RS        | LQ |
| Ursus_americanus                 | HSQDP                          | SGD   | SKLYRLHPC | RS        | LQ |
| Ursus_arctos_horribilis          | HSQDP                          | SGD   | SKLYRLHPC | RS        | LQ |
| Ursus_maritimus                  | HSQDP                          | SGD   | SKLYRLHPC | RS        | LQ |
| Varanus_komodoensis              | HSQDP                          | SGE   | SKLYRLHPC | RS        | LQ |
| Vicugna_pacos                    | HSQDP                          | SGD   | SKLYRLHPC | RS        | LQ |
| Vidua_macroura                   | HSQDP                          | SGD   | TKLYRLHPC | RS        | LQ |
| Vireo_altiloquus                 | HSQDP                          | SGD   | TKLYRLHPC | RS        | LQ |
| Vulpes_vulpes                    | HSQDP                          | SGD   | SKLYRLHPC | RS        | LQ |
| Xiphorhynchus_elegans            | HSQDP                          | SGD   | TKLYRLHPC | RS        | LQ |
| Zalophus_californianus           | HSQDP                          | SGD   | SKLYRLHPC | RS        | LQ |
| Zapornia_aAnhinga_rufa           | HSQDP                          | SGD   | TKLYRLHPC | RS        | LQ |
| ZonoZosterops_lateralis_melanops | HSQDP                          | SGD   | TKLYRLHPC | RS        | LQ |
| Zosterops_hypoxanthus            | HSQDP                          | SGD   | TKLYRLHPC | RS        | LQ |

**Supplementary Figure S2.** RMSD of 250 ns molecular dynamics simulation trajectories of Kaiso P588A and P588<sup>cis</sup> complexes with KBS DNA.

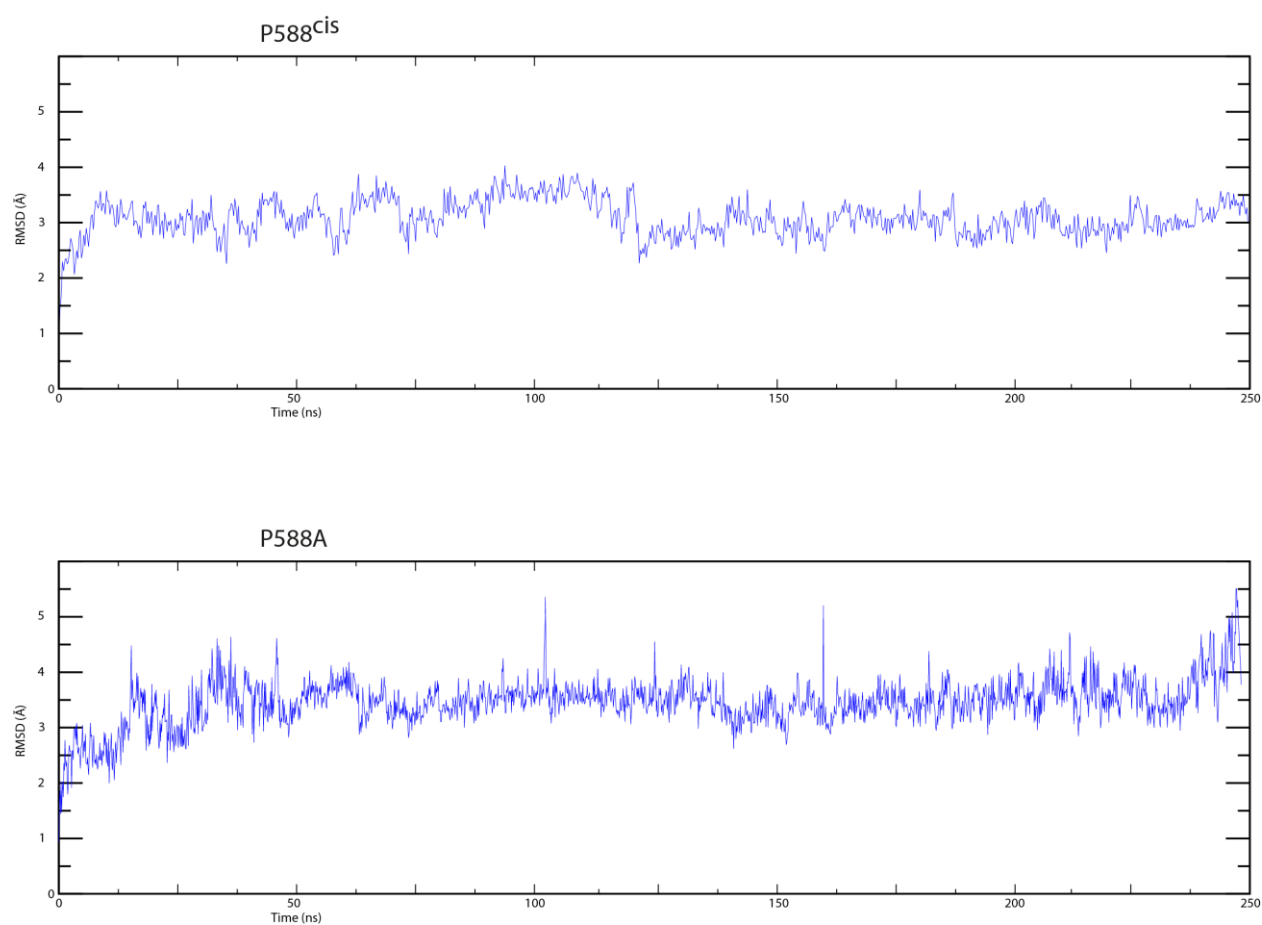

**Supplementary Figure S3.** RMSD of molecular dynamics simulation trajectories of Kaiso complex with KBS DNA.

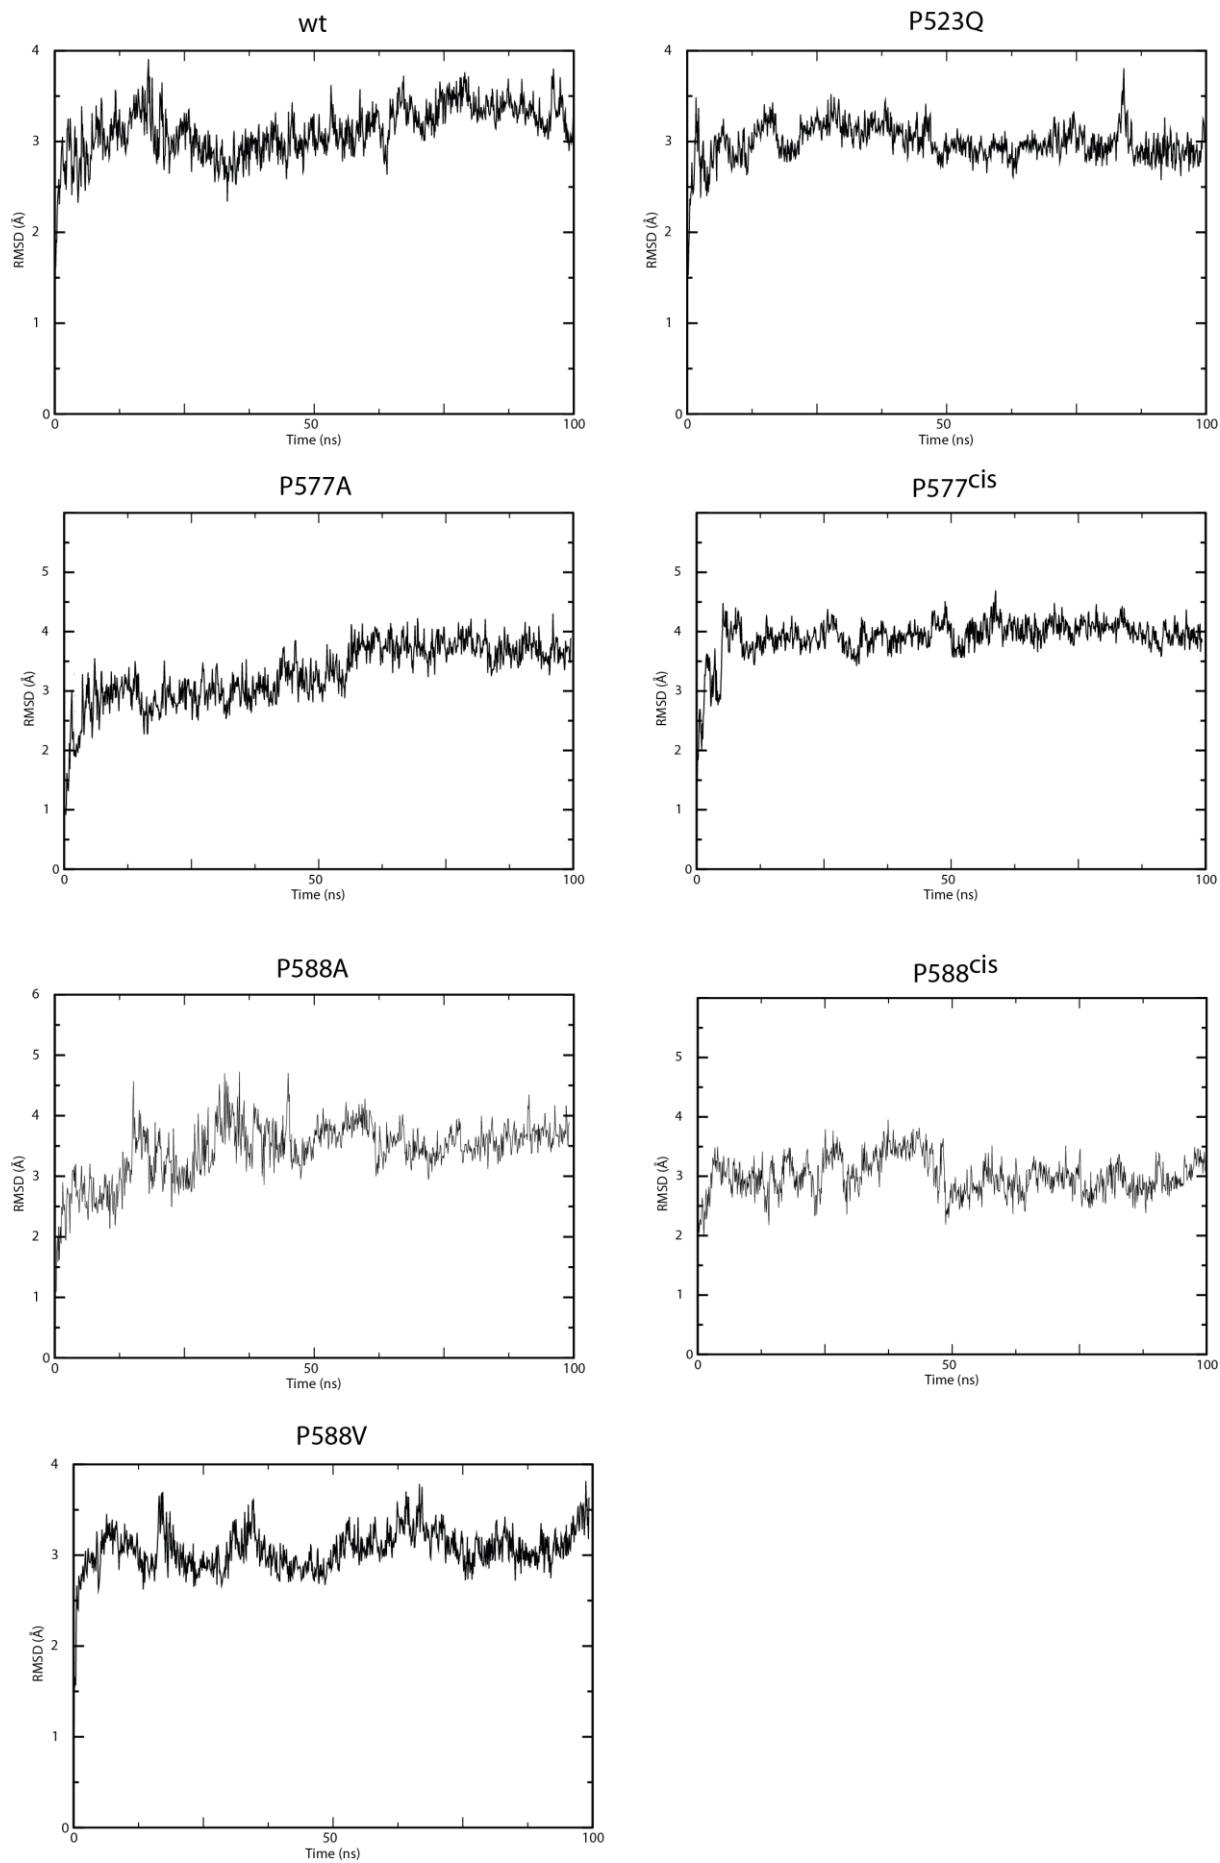

**Supplementary Figure S4.** RMSD of molecular dynamics simulation trajectories of Kaiso complex with methylated DNA.

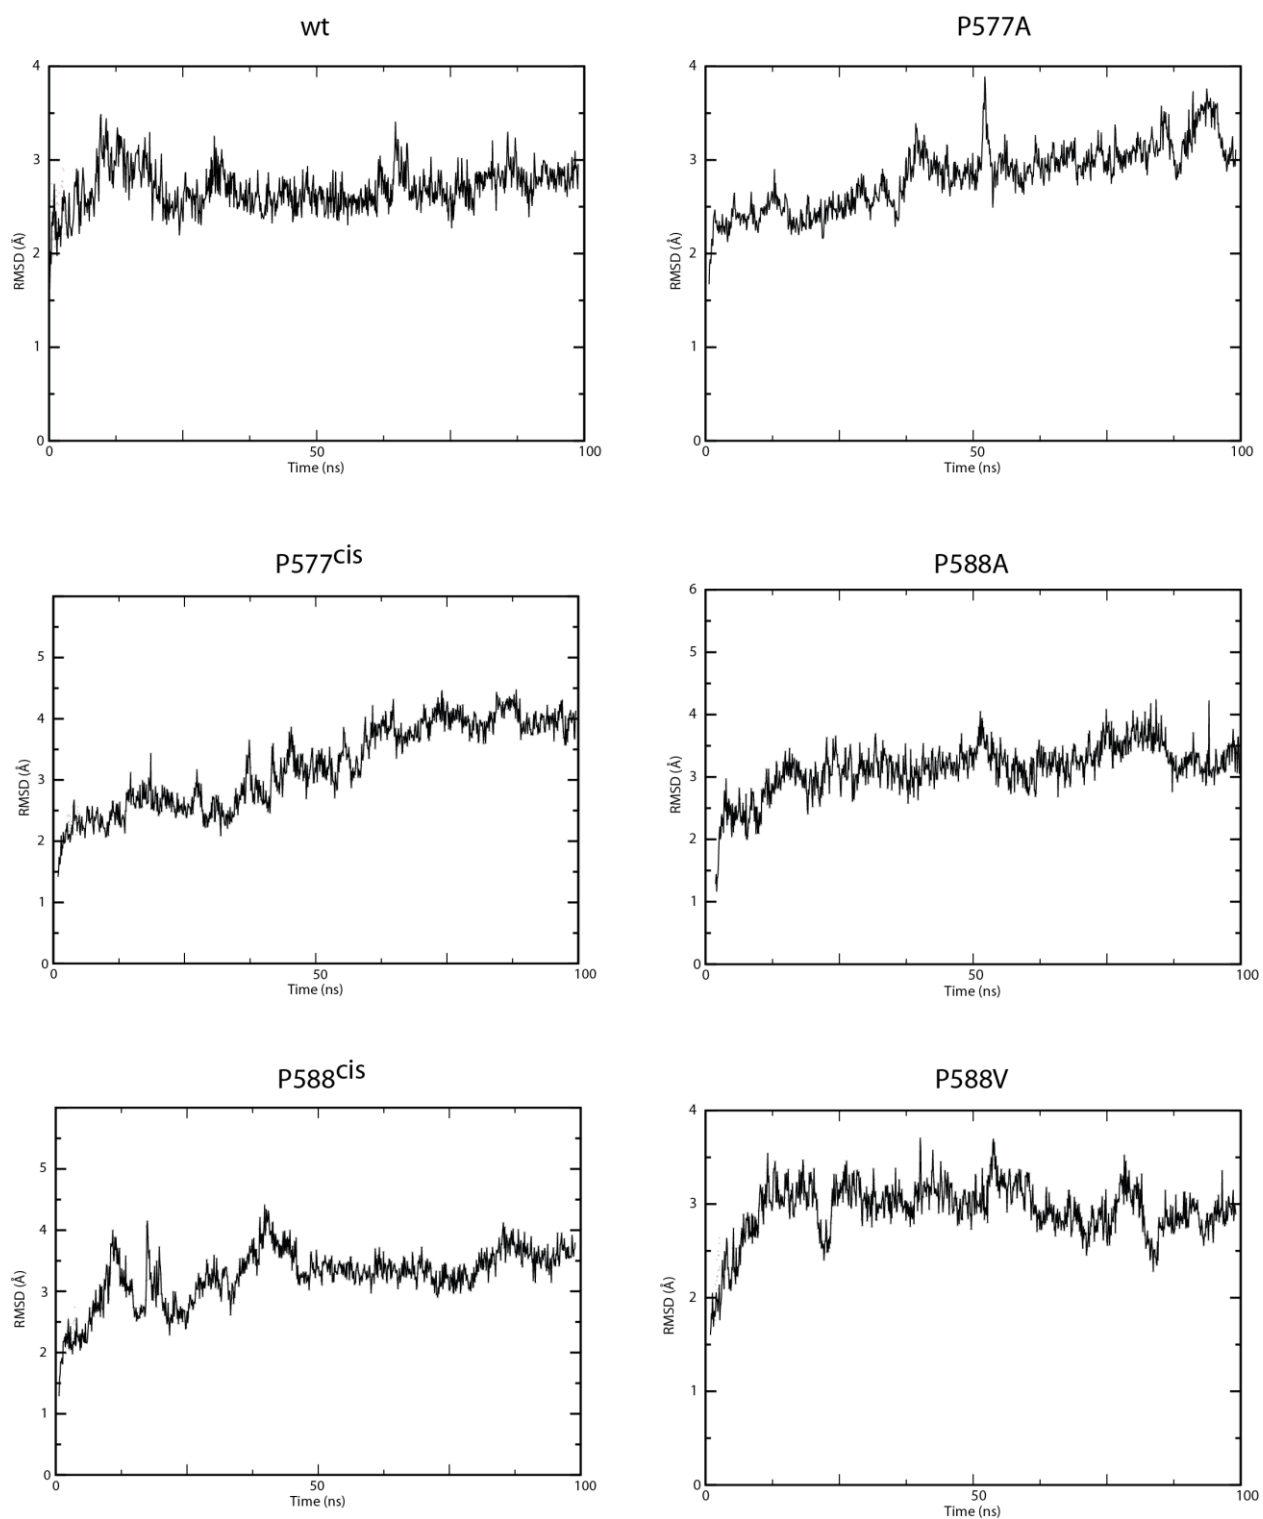

**Supplementary Figure S5.** (a) Protein preparations used for EMSA. (b) Non-specific binding controls at 10  $\mu$ M.

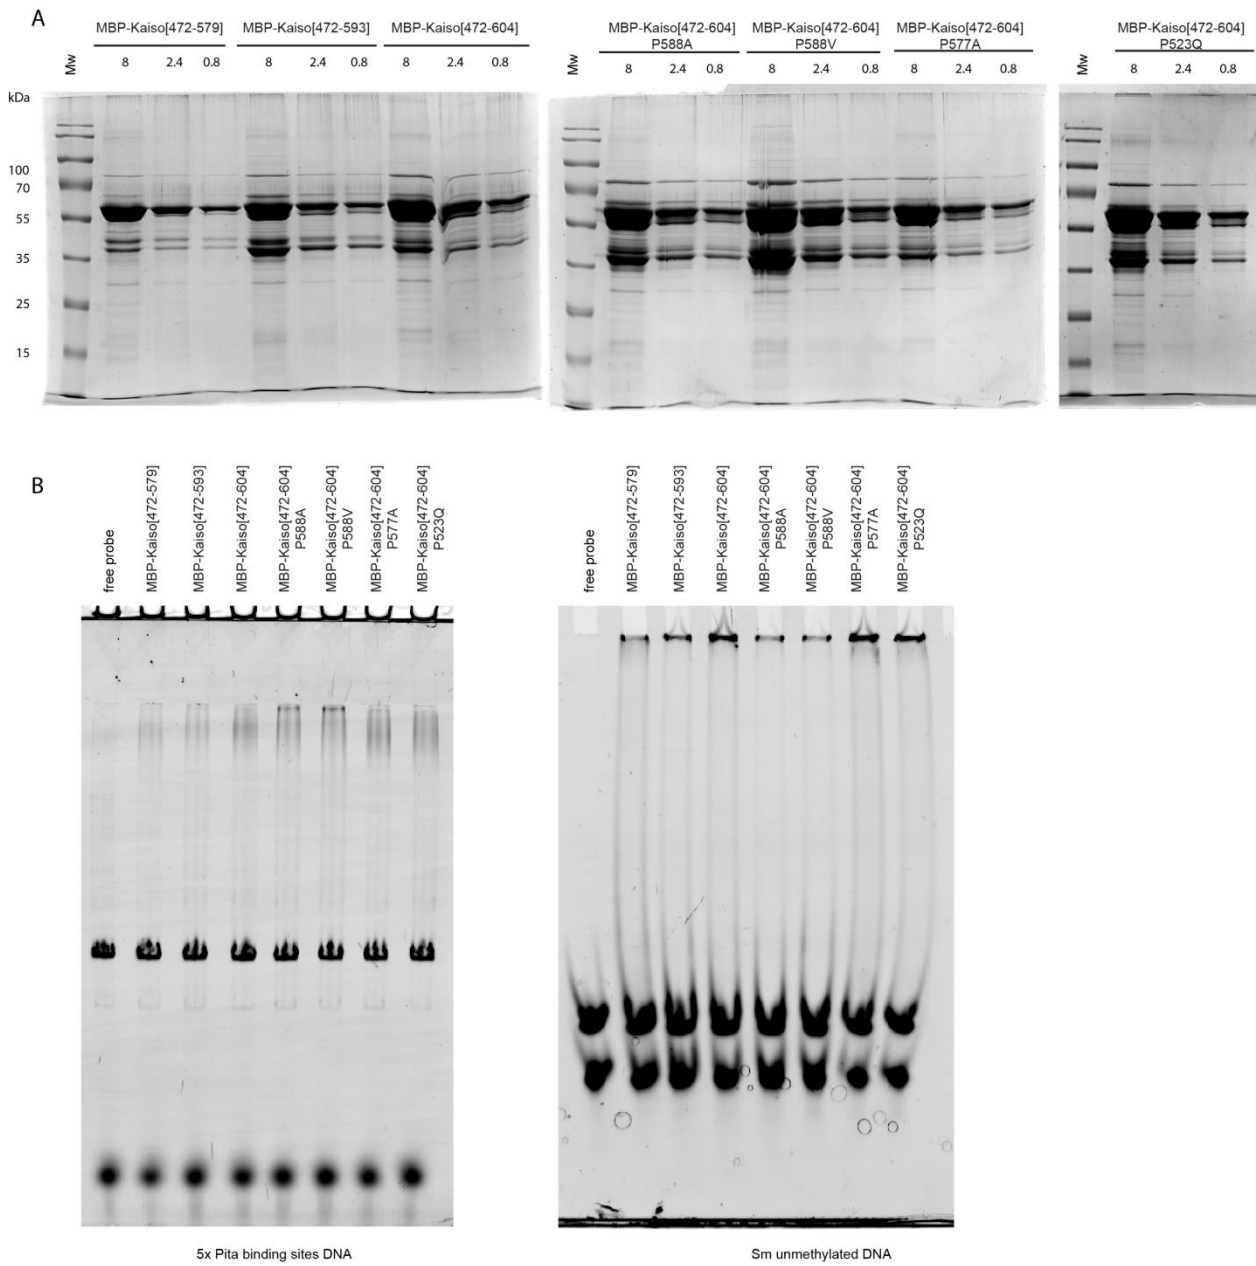

**Supplementary Figure S6.** Uncropped gels of EMSA.

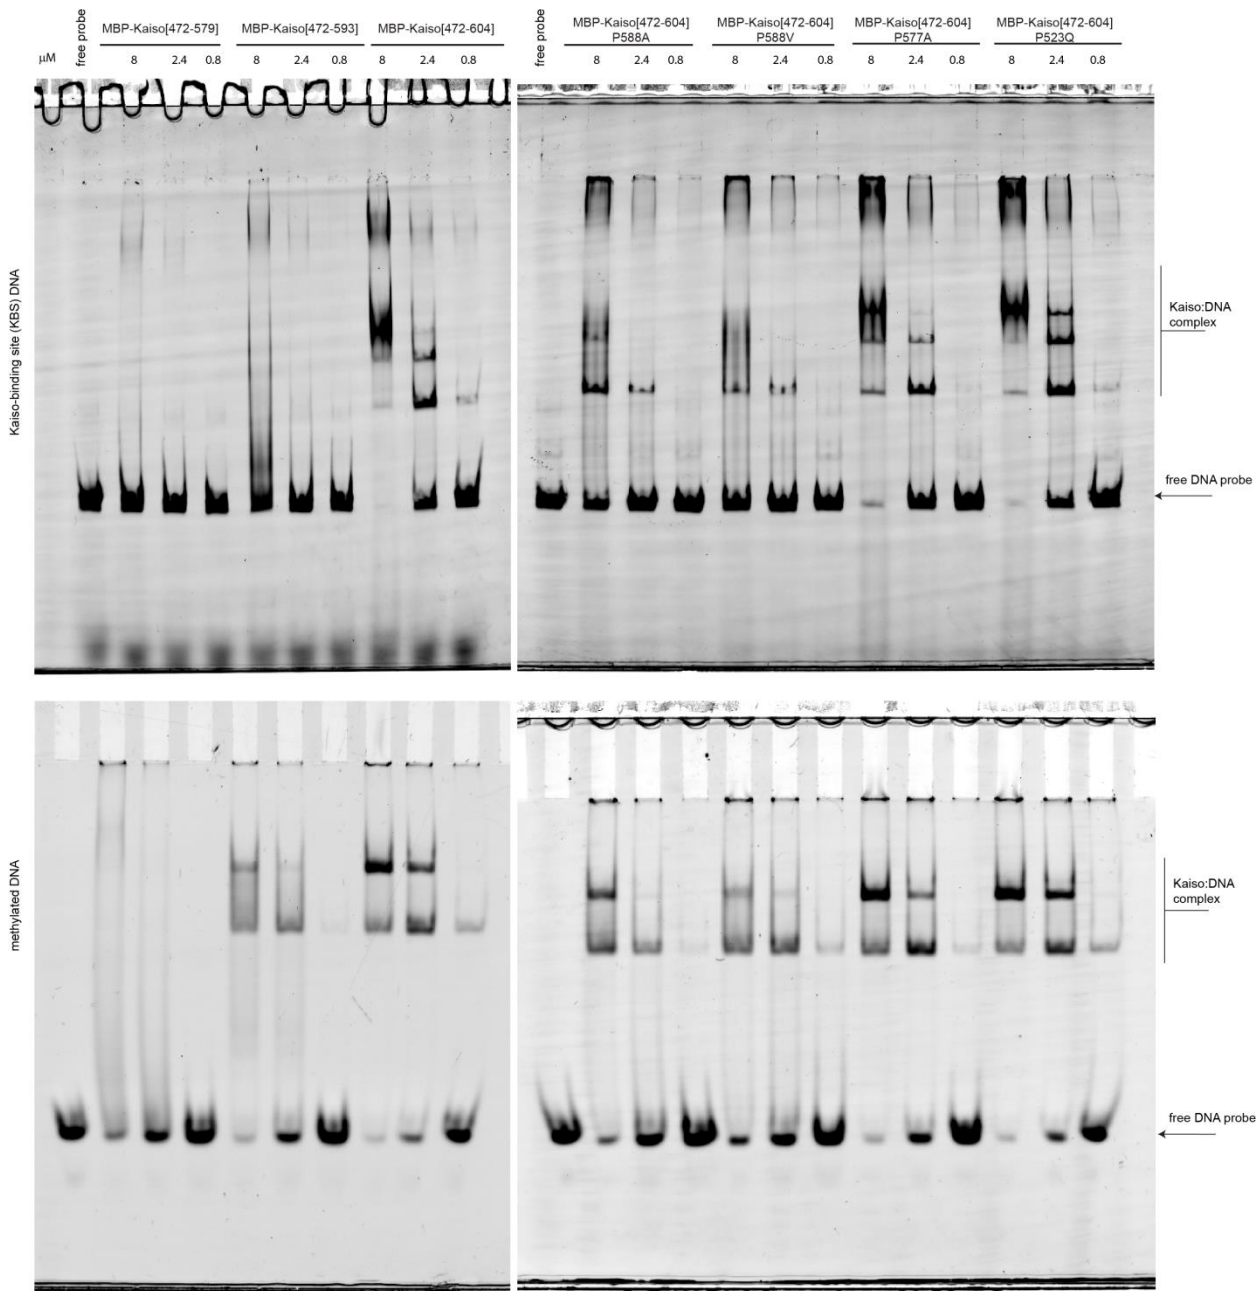

Supplement: s1 [file s1]
